1        **Effect of integrated health system leading-managing-and-governing for**  
2        **results model on institutional delivery: Team-based quasi-experiment**

3        Yeshambel Agumas Ambelie<sup>1\*</sup>, Getu Degu Alene<sup>2¶</sup> and Damen Hailemariam Gebrekiros<sup>3¶</sup>

4        <sup>1</sup> Department of Health Service Management and Health Economics, School of Public Health,  
5        College of Medicine and Health Sciences, Bahir Dar University, Bahir Dar, Ethiopia.

6        <sup>2</sup> Department of Epidemiology and Biostatistics, School of Public Health, College of  
7        Medicine and Health Sciences, Bahir Dar University, Bahir Dar Ethiopia.

8        <sup>3</sup> Department of Health Service Management and Health Economics, School of Public Health,  
9        College of Health Sciences, Addis Ababa University, Addis Ababa, Ethiopia.

10       \*Corresponding author

11       **Email: [yeshambela@bdu.edu.et](mailto:yeshambela@bdu.edu.et) (YA)**

13 **Abstract**

14 **Objective:** The objective of this study is to examine, based on theory of change, whether  
15 integrated leading-managing-and-governing for results model is plausible cause of improved  
16 institutional delivery.

17 **Methods:** A team-based quasi-experimental study was conducted. One-hundred-thirty-four  
18 health facility teams were enrolled in the study. Teams were allocated to intervention and  
19 control groups in a 1:1 ratio, non-randomly. End line institutional delivery was the dependent  
20 variable while the group (main predictor) and the baseline institutional delivery (covariate)  
21 were independent variables. The intervention that was given over six months was integrated  
22 leading-managing-and-governing for results model. The institutional deliveries were  
23 measured with percentages whilst the group was measured with exposure status (yes or no) to  
24 the intervention. Data, from both groups, were collected at baseline and end line. Data were  
25 analyzed using analysis of covariance. Statistical significance was determined at ( $p < .05$ ). The  
26 main effect of the intervention was determined by 95% CI, presented in the contrast results.

27 **Results:** The adjusted mean institutional deliveries with 95% CI were 47.4 (46.2, 48.6) and  
28 33.4 (32.2, 34.6) in the intervention and control groups, respectively. Contrast results showed  
29 that having an intervention group,  $p = .000$ , 95% CI (12.2, 15.8), of integrated leading-  
30 managing-and governing for results model significantly increased mean institutional delivery  
31 compared to having a control group.

32 **Conclusions:** This study provides some guidance regarding the plausible causation of  
33 integrated leading-managing-and-governing for results model on institutional delivery. It  
34 would serve as a baseline in identifying true causation using a randomized design.

35 **Key Words:** Effect, ILMG for Results Model, Institutional Delivery, Quasi-Experiment

## 37 **Introduction**

38 Strong health system is required to address global concerns such as Universal Health  
39 Coverage (UHC)[1,2]. To realize this, six critical health system building blocks are  
40 identified[3,4]. This includes service delivery, health workforce, medical products, health  
41 information systems, healthcare financing, and leadership and governance. But, leadership  
42 and governance is remained the most challenging to measure, particularly in Low and  
43 Middle-Income Country (LMIC) health systems[5,6]. Perhaps, it might be due to lack of  
44 scientifically reliable and empirically scalable practices.

45 Despite this challenge, Integrated Leading-Managing-and-Governing (ILMG) for results  
46 model (**Fig 1**), centered in the leadership development program, has been employed over 50  
47 LMIC health systems including Ethiopia[5,6]. Mainly, this has been implemented as a pilot  
48 project through the technical support and budget aid from international organizations like  
49 Management Science for Health (MSH), John Snow Inc. (JSI) and United States Agency for  
50 International Development (USAID)[3,7].

51 **Fig 1.** Conceptual model: ILMG for results (Source: MSH, 2015)

52 In fact, in the beginning, the model held only integrated leading and managing practices[7-9].  
53 But, a decade later, it holds the current structure (**Fig 1**) through incorporating governing  
54 practices[3,10]. Additionally, using factor analysis technique, the current authors reported  
55 four integrated latent factors of the three paths[10]. These are compliance with principles,  
56 strategic sensitivity, system building and contextual thoughtfulness. Such findings strengthen  
57 the challenging characteristics of measuring the leadership and governance building block.

58 The model (**Fig 1**), particularly in Ethiopia, is applied in the USAID transform primary  
59 health care project health facilities, with a goal of ending preventable maternal mortality.

60 Away from its enormous expansion, only limited studies report the effect of the model on  
61 improved health system performance and sustained health outcomes[6,8,9,11]. The studies  
62 done in Kenya, Egypt and Mozambique reported that applying the model increased 10%, 41%  
63 and 10% average coverage rate on selected health-service delivery indicators. However, the  
64 latter two studies were done retrospectively for evaluating pilot projects[9,11].

65 On the contrary, the study done in Afghanistan reported that there was no statistically  
66 significant effect of the intervention on health system performance[12]. Rather, it showed that  
67 many indicators worsened in the intervention group.

68 Generally, the previous studies lack either using control group[9,11] or controlling plausible  
69 confounding factors[8,9,11,12].

70 Thus, researching the effect of any initiative led by Theory of Change (ToC) and using  
71 rigorous methodology would be important in generating better evidences[13,14]. ToC refers a  
72 systematic and cumulative study of the links between input, activities, output, outcome and  
73 context of the initiative[14]. There are three identified attributes to achieve the potential of  
74 ToC on initiatives: plausibility, doability and testability [13,15]. Plausibility refers whether  
75 activities implemented should lead to desired outcomes; doability is about availability of all  
76 resources to carry out the initiative, and testability explains presence of specific and complete  
77 ToC to track its progress in credible and useful ways. Moreover, the research done in Kenya  
78 acknowledged that using research outcome of interests that varied from team to team lead the  
79 analysis to focus on average coverage or service volume rather than on specific indicators[8].  
80 To avoid this, they recommended focusing on either teams addressing the same indicator or a  
81 set of related indicators.

82 Therefore, this study aims at examining the effect of the ILMG for results model on  
83 Institutional Delivery (ID) using a prospective pre–post intervention no-treatment control group  
84 team-based[16] quasi-experimental study. Quasi-experiment is an empirical study design  
85 used to estimate the plausible causal impact of an intervention on its target population without  
86 random assignment[17,18]. The findings of this study would support evidence-based  
87 leveraging of the model at all levels that is either scale-up or re-design it; as well as serve as a  
88 baseline for future research.

## 89 **Methods**

### 90 **Study design and teams**

91 A prospective pre–post intervention no-treatment control group team-based quasi-experimental  
92 study was conducted. One-hundred-thirty-four health facility teams were enrolled in the study.  
93 These teams were allocated to intervention and control groups in a 1:1 ratio, non-randomly.  
94 Integrated leading-managing-and-governing for results model was given to the intervention  
95 group. Yet, the control group was followed without any intervention. Moreover, teams were  
96 intact and worked together over the intervention period.

### 97 **Intervention**

98 The ILMG for results model was delivered over six-month period. Based on the intervention  
99 protocol (**S1 appendix**), basic concepts that enable the teams to face challenges, and achieve  
100 results were transferred with two consecutive off-site three-day workshops.

101 During the first workshop, the main task that the teams carried out was developing six-month  
102 project on ID using a tool called the Challenge Model (CM)[3,9] (**Fig 2**).

103 **Fig 2.** The challenge Model (Source: Mansour M et al, 2010)

104 The activities, elements of the CM, that the teams worked step-by-step were: reviewed their  
105 respective facility mission; set a shared vision in lined with facility vision; developed six-

106 month Measurable Result (MR); assembled current situation (baseline); identified obstacles  
107 and root causes[19-21]; developed inspirational challenge statement by combining the MR  
108 and obstacles; and designed priority actions to avert obstacles. Moreover, they identified  
109 potential stakeholders to align and mobilize resources for better result.

110 With all the above activities done, the teams were sent back to their respective working place,  
111 taking an assignment of sharing and validating the project with the other staff and key  
112 stakeholders. Additionally, teams were encouraged to exercise the ILMG for results model.

113 After average period of one-month, the teams were called back for the second workshop. It  
114 was began with presentations and discussion on the validated projects. Furthermore, teams  
115 were facilitated to develop action plan and monitoring and evaluation (M&E) plan using  
116 respective planning formats (**S2 and S3 Appendixes**). Moreover, concepts of coaching using  
117 Observe, Ask, Listen, Feedback and Agree (OALFA) technique; communication using  
118 effective model (**S4 Appendix**); managing facility resource and health services delivery were  
119 presented and discussed. By the end of the third day, the teams were sent back to their  
120 respective working place for the actual implementation of their projects.

121 Another-month after, based-on the OALFA technique, the facilitators including the  
122 investigators did on-site coaching visit for each team. Facilitators were certified experts for  
123 integrated leadership-management-and governance Trainer of Trainees (TOT), from the  
124 Ethiopian federal ministry of health. Participatory, enquiry-based and practice-oriented  
125 facilitation approaches were employed. In addition, brainstorming ideas, insight-invoking  
126 questions, role-plays, group discussion, case studies and work place assignments were also  
127 used. Moreover, concise and comprehensive notes, tables and figures were distributed to  
128 teams as needed.

129 **Variables and measurements**

130 The Dependent Variable (DV) was the end line ID while the main independent variable was  
131 the group. Another independent variable, the baseline ID that had an influence on the DV was  
132 considered as a covariate. Regarding to measurements, both the baseline and end line  
133 institutional deliveries were measured with percentage means. The groups were measured  
134 with exposure status (yes or no) to the intervention.

135 **Data collection and analysis**

136 The baseline and end line data were collected from teams of each group. Before getting to the  
137 final analysis, five stages of data analyses were conducted. These were done using the  
138 statistical package for the social sciences version 20. First, descriptive analysis was done to  
139 characterize the ordinary mean ID. Second, assumptions of no presence of significant outliers  
140 and approximately normally distributed data for each group were assessed by boxplot and  
141 Shapiro-Wilk test.

142 Third, in the absence of the covariate, the effect of the group on the DV was tested using  
143 Analysis of Variance (ANOVA). The output indicated significant result:  $F(1,132) = 79.0$ ,  
144 partial eta squared = .37, and  $p < .001$ . Partial eta squared measured the proportion of the total  
145 variance (effect size) on the DV that is associated with the membership of different groups  
146 defined by a group[22]. For example, the above output showed that the group (intervention  
147 and control) accounted for 37% of the variability on the DV.

148 Fourth, group-covariate interaction effect was checked using custom model of Analysis of  
149 Covariance (ANCOVA). It tested differences between group means when we knew that an  
150 extraneous variable affected the outcome of interest[23,24]. Observing at the p-value of the  
151 analysis output:  $F(1,130) = 1.6$ , partial eta squared = .01 and  $p = .21$ , it was obvious that the

152 covariate was not significantly predicted the DV. The other important output displayed from  
153 this analysis was the result of Levene's test:  $F(1, 132) = 58.5$  and  $p = 0.000$ . It indicated that  
154 the group variances were not equal and hence the assumption of homogeneity of variance was  
155 violated. This further showed that we failed to reject the null hypothesis in that there was no  
156 group by covariate effect on DV. Alternatively, the covariate had the same correlation with  
157 the DV for both intervention and control groups; and the correlation between the covariate  
158 and DV was while they differ for intervention and control groups. Precisely speaking, there  
159 was no Lord's paradox[24-26]. Fifth, the effect of the group on the covariate was also tested  
160 using ANOVA. The output presented that the group was not significantly predicted the  
161 covariate:  $F(1, 132) = 2.8$ , partial eta squared = .02, and  $p = .09$ .

162 Considered the above outlooks, ANCOVA with full factorial model was conducted to  
163 evaluate the main effect of the group on DV. The 95% CI from the contrast results was used  
164 in determining the main effect of the intervention. From this output, two things were  
165 considered: (1) did significant value less than .05, and (2) did not the CI include zero.

166 The CI here was the difference between means, the original means adjusted for the covariate  
167 that showed the likely value in the population. In reality, if the difference between means is  
168 zero, then it tells there is no difference between the groups. If the CI does not contain zero, it  
169 means that the effect in population is likely to be bigger or smaller than zero.

## 170 **Ethical considerations**

171 The current study was registered at [clinical trials.gov](https://clinicaltrials.gov) with identifier NCT03639961.  
172 Additionally, ethical clearance was secured from Bahir Dar University (BDU) with a protocol  
173 record 090/18-04. Moreover, written consent was obtained from each members of study  
174 teams; and data were protected.



175 **Results**

176 **Ordinary means**

177 Table 1 displays the ordinary mean and standard deviation (SD) of the baseline and end line  
 178 ID with 95% CI. The mean difference between the baseline and end line ID was  $14.6 \pm 7.2$  in  
 179 the intervention group, whereas, it was  $1.1 \pm 2.2$  in the control group.

180 **Table 1** Ordinary mean (SD) baseline and end line ID (n= 134)

| Group        | Institutional Delivery (ID) |           |        |       |           |        |       |
|--------------|-----------------------------|-----------|--------|-------|-----------|--------|-------|
|              | Measure                     | Baseline  |        |       | End line  |        |       |
|              |                             | Statistic | 95% CI |       | Statistic | 95% CI |       |
|              |                             |           | Lower  | Upper |           | Lower  | Upper |
| Intervention | Mean                        | 34.2      | 30.7   | 37.5  | 48.8      | 46.2   | 51.9  |
|              | SD                          | 12.8      | 10.6   | 14.8  | 12.6      | 10.4   | 14.4  |
| Control      | Mean                        | 30.9      | 28.6   | 33.2  | 32.0      | 29.5   | 34.6  |
|              | SD                          | 9.5       | 7.1    | 11.5  | 9.1       | 6.9    | 11.2  |

181 **Estimated means**

182 Table 2 presents the adjusted mean end line ID for both groups that were the original means  
 183 adjusted for the covariate. The mean values had changed compared to those found in  
 184 the ordinary mean (**Table 1**).

185 **Table 2** Adjusted mean end line ID (n= 134)

| Group        | Mean | Std. Error | 95% Confidence Interval |             |
|--------------|------|------------|-------------------------|-------------|
|              |      |            | Lower Bound             | Upper Bound |
| Intervention | 47.4 | .627       | 46.2                    | 48.6        |
| Control      | 33.4 | .627       | 32.2                    | 34.6        |

*Note: The covariate appearing in the model was evaluated at the following value: baseline ID = 32.6.*

186 **The main effect of the group on the DV**

187 Table 3 informs that there was an overall statistically significant difference on the DV  
 188 between the groups once their means had been adjusted for the covariate. As highlighted in  
 189 the table, there was statistically significant difference between adjusted means:  $F(1,131) =$   
 190  $247.2$ , partial eta squared = .65 and  $P < .001$ . Considered the partial eta squared value, the main

191 effect size of the group on DV was 65%. This showed that including the covariate increased  
 192 the group's effect size on the DV from 37% (explained in methods part) to 65%.

193 **Table 3** Outputs of between-subjects effects on end line ID, ANCOVA (n = 134)

| Source          | Type III Sum of Squares | Df  | Mean Square | F     | Sig. | Partial Eta Squared |
|-----------------|-------------------------|-----|-------------|-------|------|---------------------|
| Corrected Model | 21955.8                 | 2   | 10977.9     | 421.7 | .000 | .87                 |
| Intercept       | 2169.6                  | 1   | 2169.6      | 83.3  | .000 | .39                 |
| Baseline ID     | 12460.4                 | 1   | 12460.4     | 478.6 | .000 | .79                 |
| Group           | 6435.3                  | 1   | 6435.3      | 247.2 | .000 | .65                 |
| Error           | 3410.4                  | 131 | 26.0        |       |      |                     |
| Total           | 244108.0                | 134 |             |       |      |                     |
| Corrected Total | 25366.2                 | 133 |             |       |      |                     |

Note: *R Squared* = .87, *Adjusted R Squared* = .86

194 Yet, Table 3 also displayed that the covariate had significant effect at (P<.001). Thus, to  
 195 interpret such outputs, double testing using contrast results (K matrix) (**Table 4**) was used.

196 **Table 4** K Matrix

| Group                    |                                      | DV          |      |
|--------------------------|--------------------------------------|-------------|------|
|                          |                                      | End line ID |      |
| Intervention vs. Control | Contrast Estimate                    | 14.0        |      |
|                          | Hypothesized Value                   | 0           |      |
|                          | Difference (Estimate - Hypothesized) | 14.0        |      |
|                          | Std. Error                           | .89         |      |
|                          | Sig.                                 | .000        |      |
|                          | 95% CI for Difference                | Lower Bound | 12.2 |
|                          |                                      | Upper Bound | 15.8 |

Note: Reference category = Control group

197 The output indicated significant result (P<.001), and the 95% CI was (12.2, 15.8). This  
 198 showed that the main effect of the intervention was somewhere between this CI.

## 199 Discussion

200 The current study findings inform that the ILMG for results model intervention causes  
 201 statistically significant difference on mean ID between the groups. This plausible causation is  
 202 supported by a study done in Kenya[8]. Differently, the current study shows the effect size by  
 203 adjusting the original means for the covariate. This has three-fold purposes[18]. First, it  
 204 reduces within-group error variance that is the intervention effect bias or specification error.

205 Second, it eliminates potential confounders since there is no preexisted group differences  
206 systematically on more than it is. Last, it provides additional evidence of causality.

207 The current finding is also supported by other previous studies[9,11]. However, unlike these  
208 studies, the current study controlled a plausible covariate (noted earlier) and used control  
209 group. Using control group helps to identify assumption attributes in trends between the  
210 groups that occur at the same time as the intervention to that intervention.

211 The other distinction of the current study is that it used the model that integrated leading-  
212 managing-and-governing practices (Fig 1) while the other studies used either leading and  
213 managing practices[8,9] or governing practices[12]. Interestingly, the effect of balancing and  
214 integrating leading managing and governing practices in improving service-delivery outcome  
215 in a turbulent environment is similar to keeping the seat of a three-legged stool horizontal  
216 while sitting on rough ground[27] (**Fig 3**).

217 **Fig 3.** Illustration of a sit on adjusted three-legged stool with effect of ILMG practices on services outcomes

218 On the contrary, the study done in Afghanistan reported that there was no statistically  
219 significant effect of the intervention on health system performance or health outcomes[12].

220 Rather, it showed that many indicators worsened in the intervention group. As explained by  
221 the authors of the study, the intervention environment was fragile and conflict affected in the  
222 study period. This supports the significant influence of the turbulent environment to achieve  
223 significant results through interventions.

224 In the current study, the adjusted mean ID (**Table 2**) compared with the ordinary mean ID  
225 (**Table 1**) is less in the intervention group, but greater in the control group. This implies that  
226 adjusting the mean by removing error variance in the DV that associates with the covariate  
227 provides unbiased or uncontaminated mean.

228 The current adjusted means in both groups are also greater compared with the 2016 Ethiopian  
229 demographic health survey ID report (26%). However, compared with the 2019 demographic  
230 health survey ID report (48%): the current adjusted mean ID in the intervention group is  
231 similar, but it is less in the control group. These mean institutional deliveries are also by far  
232 lower than the target (90%) indicated in the national health sector plan, 2015-2019. Taking  
233 into consideration, perhaps, the national survey result includes data from big cities, evidence-  
234 based investment on ILMG for results model ought to be important.

235 In spite of the above implications, there were potential limitations in conducting this study.  
236 The first limitation identified was non-randomization that is the major weakness of quasi-  
237 experimental design. This weakness brought another challenge that was whether ANCOVA is  
238 used in alike data. Yet, two dimensions support its application. First, if the group have caused  
239 the difference on covariate beyond randomization[28]. Second, if the authors are certain that  
240 the group could not have affected the covariate[29]. Since there was no preexisted group that  
241 affected the covariate in the current study, ANCOVA was applied. In fact, this analysis  
242 technique is developed to increase the power of the test of the predictor variable[23,24]. It  
243 does this through removing error variance in the DV that is associated with the covariate[24].  
244 The second important threat to establishing causality was the statistical principle of regression  
245 to the mean[18]. This widespread statistical phenomenon can result in wrongly concluding  
246 that an effect is due to the intervention when in reality it is due to chance. Here, though, the  
247 degree of caution was diminished by implementing the intervention on the real-world setting,  
248 limiting generalizability of results is unavoidable[5].

249 The third potential limitation was the short duration of the intervention. Six months may not  
250 be enough time to overcome barriers and achieve significant result. Nevertheless, if it was

251 more than this with similar study design that lacks isolation and temporal precedence,  
252 contamination will be a threat on the other way round. Even with this time, though no team  
253 was recorded as loss to follow up, around 11% of intervention teams reported that at least one  
254 team member transferred to a new area at the time of intervention.

255 The last challenge, to the best of our knowledge, was dearth of available literatures on testing  
256 ILMG for results model, which of course limited the depth of our discussion.

## 257 **Conclusions**

258 This study provides some guidance regarding the plausible causation of integrated leading-  
259 managing-and-governing for results model on institutional delivery. It would support  
260 evidence-based-leveraging of the model in similar settings. It would also serve as a baseline  
261 for future research, possibly, considering randomization to identify true causation.

## 262 **Acknowledgements**

263 Our sincere appreciation go to the study participants, intervention facilitators, data collectors,  
264 and data supervisors, for their valuable contribution.

## 265 **References**

- 266 1. Murray CJ, Frenk J (2000) A framework for assessing the performance of health systems.  
267 *Bulletin of the world Health Organization* 78: 717-731.
- 268 2. Peters DH, El-Saharty S, Siadat B, Janovsky K, Vujicic M (2009) Improving health service  
269 delivery in developing countries: from evidence to action: The World Bank.
- 270 3. Management Sciences for Health. Rice JA, Shukla, Mahesh, Johnson Lassner, Karen et al.  
271 (2015) *Leaders Who Govern*. June 2015.
- 272 4. Bhutta ZA, Chopra M, Axelson H, Berman P, Boerma T, et al. (2010) Countdown to 2015  
273 decade report (2000–10): taking stock of maternal, newborn, and child survival. *The*  
274 *lancet* 375: 2032-2044.
- 275 5. Rauscher M, Walkowiak H, Djara MB (2018) *Leadership, Management, and Governance*  
276 *Evidence Compendium*.
- 277 6. Daire J, Gilson L, Cleary S (2014) *Developing leadership and management competencies*  
278 *in low and middle-income country health systems: a review of the literature*. Cape  
279 *Town: Resilient and Responsive Health Systems (RESYST)*.
- 280 7. Galer JB, Vriesendorp S, Ellis A (2005) *Managers who lead: a handbook for improving*  
281 *health services*.

- 282 8. La Rue KS, Alegre JC, Murei L, Bragar J, Thatte N, et al. (2012) Strengthening  
283 management and leadership practices to increase health-service delivery in Kenya: an  
284 evidence-based approach. *Human resources for health* 10: 25.
- 285 9. Mansour M, Mansour JB, El Swesy AH (2010) Scaling up proven public health  
286 interventions through a locally owned and sustained leadership development  
287 programme in rural Upper Egypt. *Human Resources for Health* 8: 1.
- 288 10. Yeshambel AA, Getu DA, Damen HG (21 June 2019 PREPRINT (Version 1))  
289 Performance capacity of the health system workforce towards integrated leading-  
290 managing-and-governing practices in Ethiopia: with special reference to the  
291 application of factor analysis and ordinal logistic regression.
- 292 11. Perry C (2008) Empowering primary care workers to improve health services: results  
293 from Mozambique's leadership and management development program. *Human*  
294 *resources for health* 6: 14.
- 295 12. Anwari Z, Shukla M, Maseed BA, Wardak GFM, Sardar S, et al. (2015) Implementing  
296 people-centred health systems governance in 3 provinces and 11 districts of  
297 Afghanistan: a case study. *Conflict and health* 9: 2.
- 298 13. Connell JP (1995) *New Approaches to Evaluating Community Initiatives. Concepts,*  
299 *Methods, and Contexts. Roundtable on Comprehensive Community Initiatives for*  
300 *Children and Families: ERIC.*
- 301 14. Connell JP, Kubisch AC (1998) Applying a theory of change approach to the evaluation  
302 of comprehensive community initiatives: progress, prospects, and problems. *New*  
303 *approaches to evaluating community initiatives* 2: 1-16.
- 304 15. Brown P (1995) The role of the evaluator in comprehensive community initiatives. See  
305 Ref 24a: 201-225.
- 306 16. Salas E, DiazGranados D, Klein C, Burke CS, Stagl KC, et al. (2008) Does team training  
307 improve team performance? A meta-analysis. *Human factors* 50: 903-933.
- 308 17. DiNardo J (2010) *Natural experiments and quasi-natural experiments.*  
309 *Microeconometrics: Springer.* pp. 139-153.
- 310 18. Harris AD, McGregor JC, Perencevich EN, Furuno JP, Zhu J, et al. (2006) The use and  
311 interpretation of quasi-experimental studies in medical informatics. *Journal of the*  
312 *American Medical Informatics Association* 13: 16-23.
- 313 19. Ilie G, Ciocoiu CN (2010) Application of fishbone diagram to determine the risk of an  
314 event with multiple causes. *Management Research and Practice* 2: 1-20.
- 315 20. Ballantyne D (1990) Coming to grips with service intangibles using quality management  
316 techniques. *Marketing Intelligence & Planning* 8: 4-10.
- 317 21. Collins JC, Porras JI (1996) Building your company's vision. *Harvard business review* 74:  
318 65-&.
- 319 22. Richardson JT (2011) Eta squared and partial eta squared as measures of effect size in  
320 educational research. *Educational Research Review* 6: 135-147.
- 321 23. Cochran WG (1957) Analysis of covariance: its nature and uses. *Biometrics* 13: 261-281.
- 322 24. Miller GA, Chapman JP (2001) Misunderstanding analysis of covariance. *Journal of*  
323 *abnormal psychology* 110: 40.
- 324 25. Jin P (1992) Toward a reconceptualization of the law of initial value. *Psychological*  
325 *Bulletin* 111: 176.
- 326 26. Lord HW, Shulman Y (1967) A generalized dynamical theory of thermoelasticity. *Journal*  
327 *of the Mechanics and Physics of Solids* 15: 299-309.

- 328 27. Levey S, Vaughn T, Koepke M, Moore D, Lehrman W, et al. (2007) Hospital leadership  
329 and quality improvement: rhetoric versus reality. *Journal of Patient Safety* 3: 9-15.  
330 28. Overall JE, Woodward JA (1977) Nonrandom assignment and the analysis of covariance.  
331 *Psychological Bulletin* 84: 588.  
332 29. Wildt AR, Wildt AA, Ahtola O, Ahtola OT (1978) *Analysis of covariance*: Sage.  
333

334 **Supporting information**

335 **S1 Appendix.** Intervention protocol

336 **S2 Appendix.** Action plan planning format

337 **S3 Appendix.** M&E plan planning format

338 **S4 Appendix.** Effective communication model

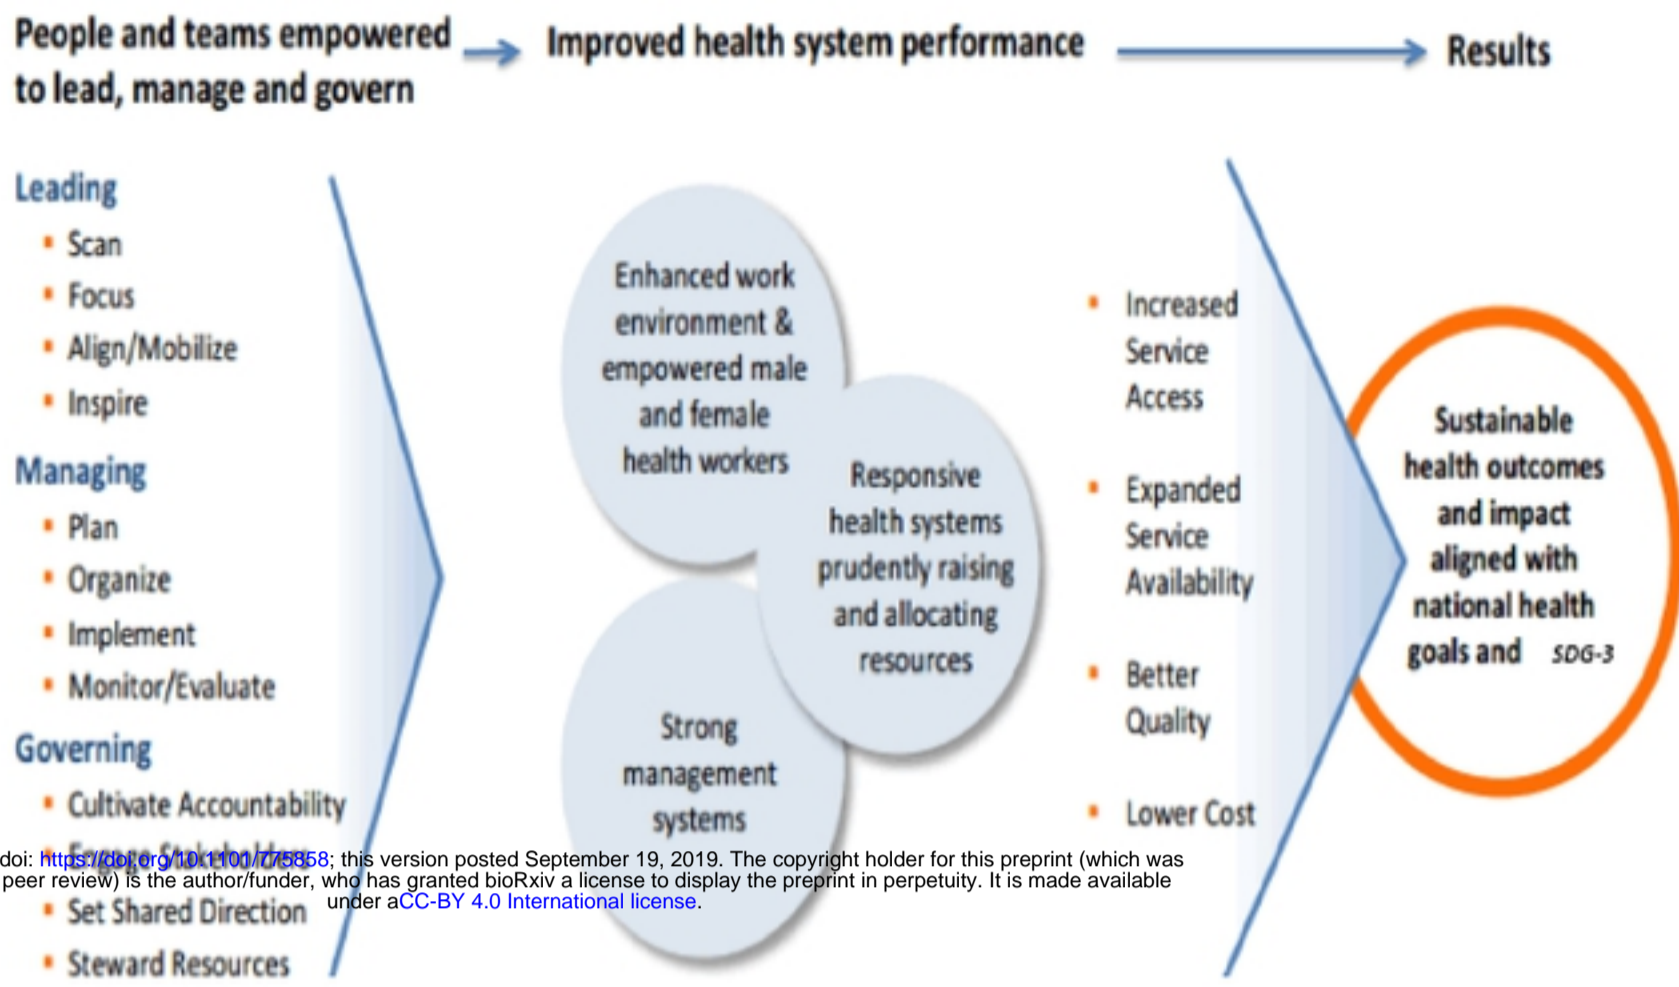

bioRxiv preprint doi: <https://doi.org/10.1101/2019.09.19.28858>; this version posted September 19, 2019. The copyright holder for this preprint (which was not certified by peer review) is the author/funder, who has granted bioRxiv a license to display the preprint in perpetuity. It is made available under aCC-BY 4.0 International license.

Figure 1



# The Challenge Model

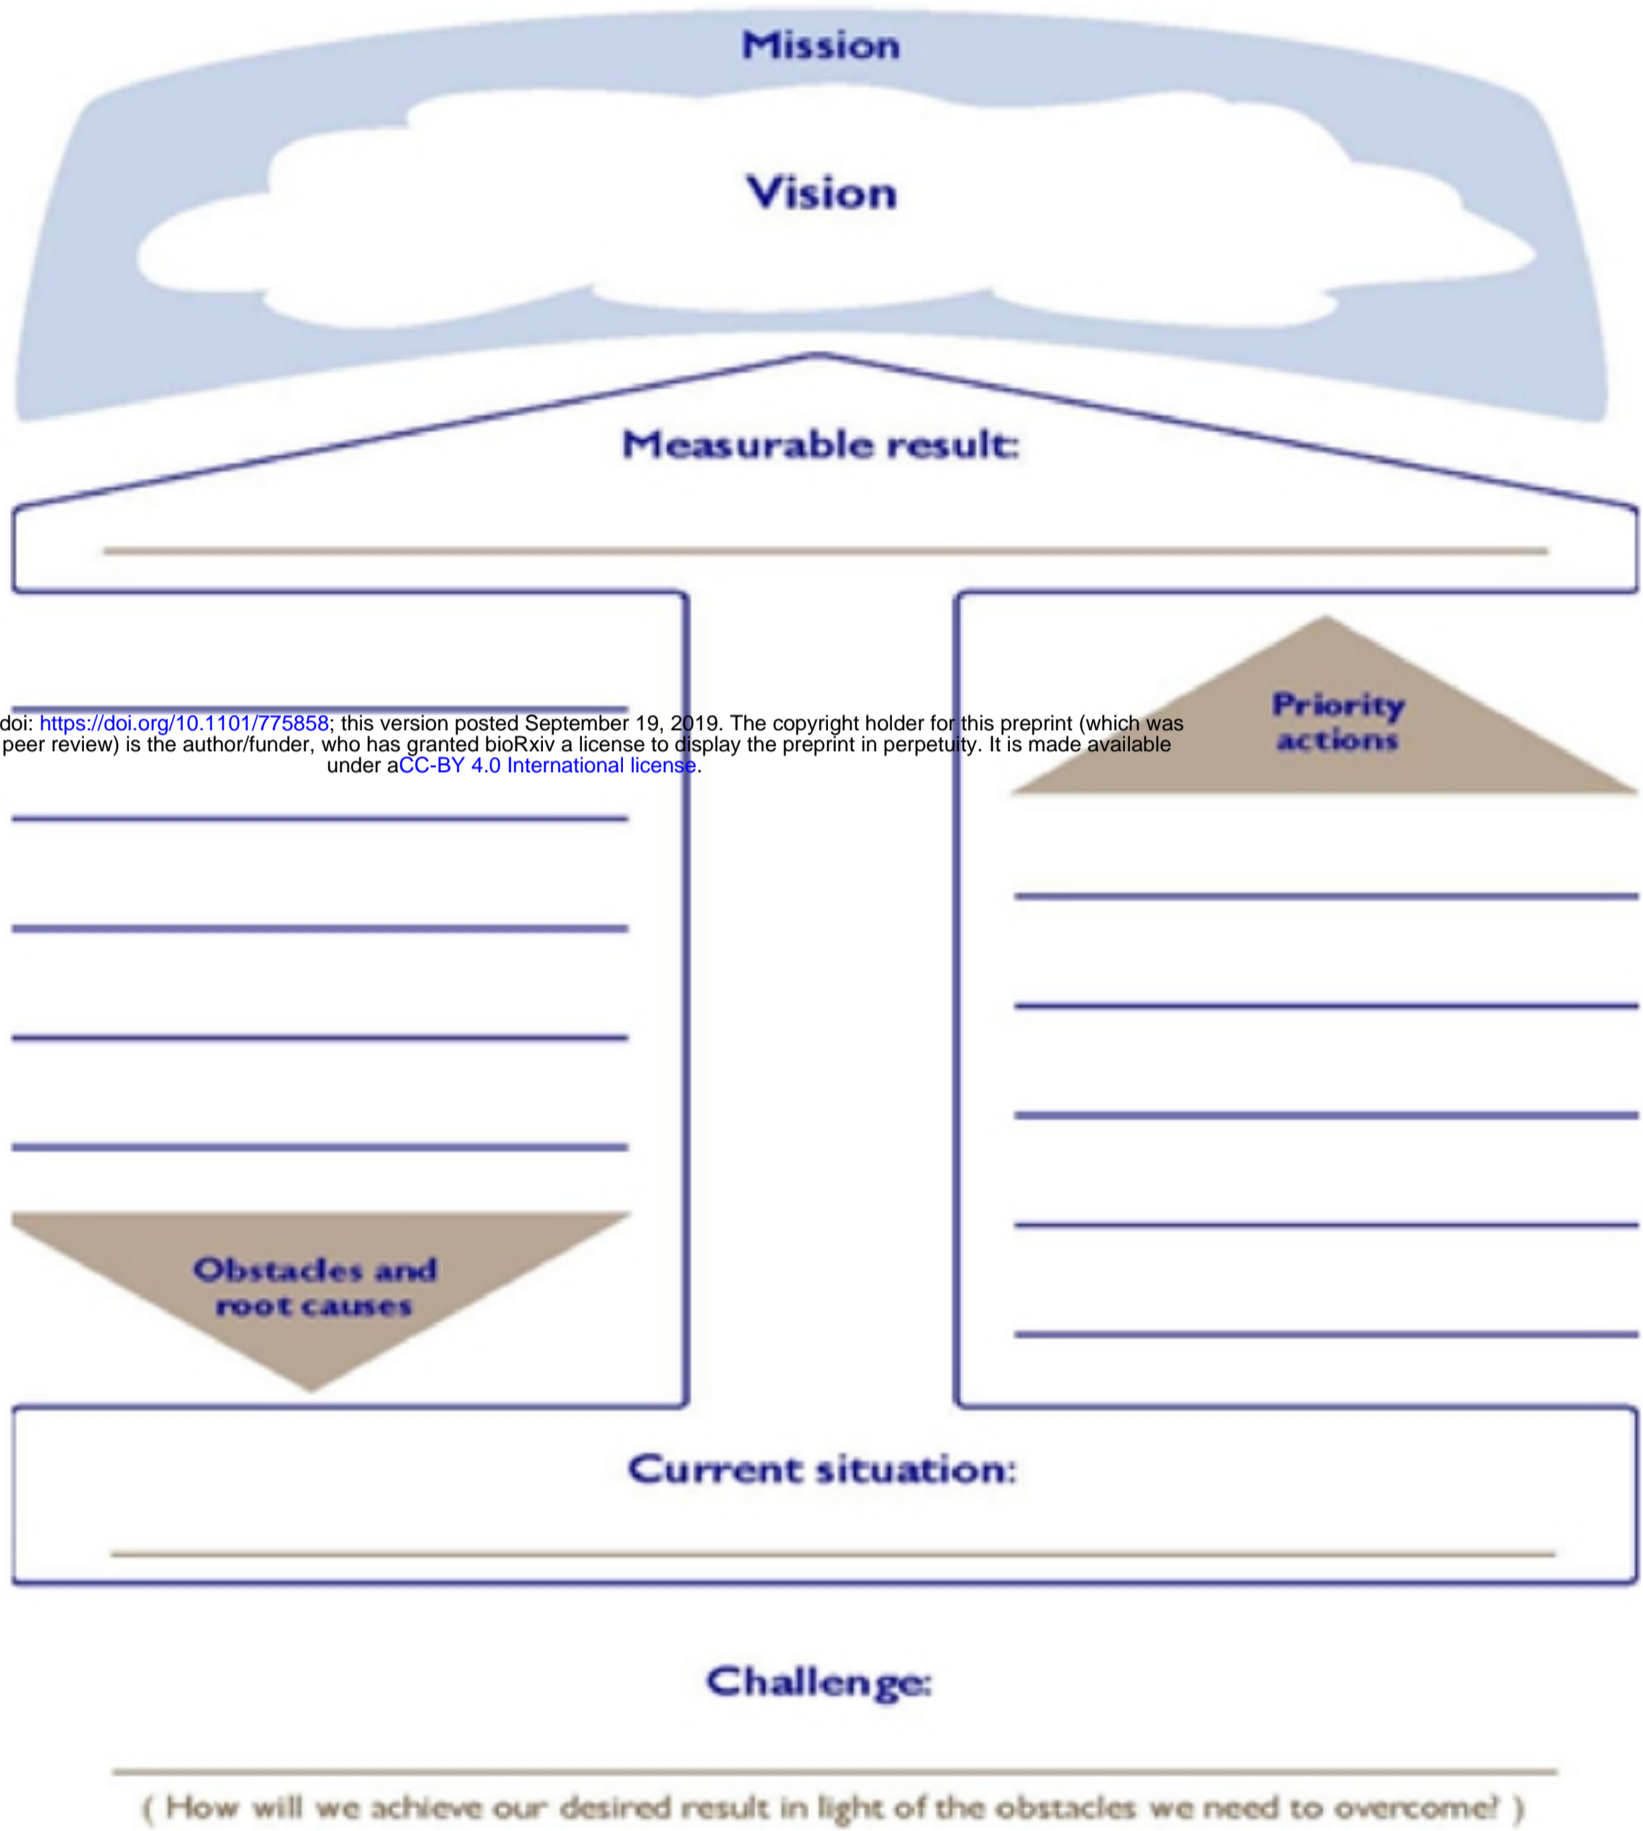

bioRxiv preprint doi: <https://doi.org/10.1101/775858>; this version posted September 19, 2019. The copyright holder for this preprint (which was not certified by peer review) is the author/funder, who has granted bioRxiv a license to display the preprint in perpetuity. It is made available under aCC-BY 4.0 International license.

Figure 2

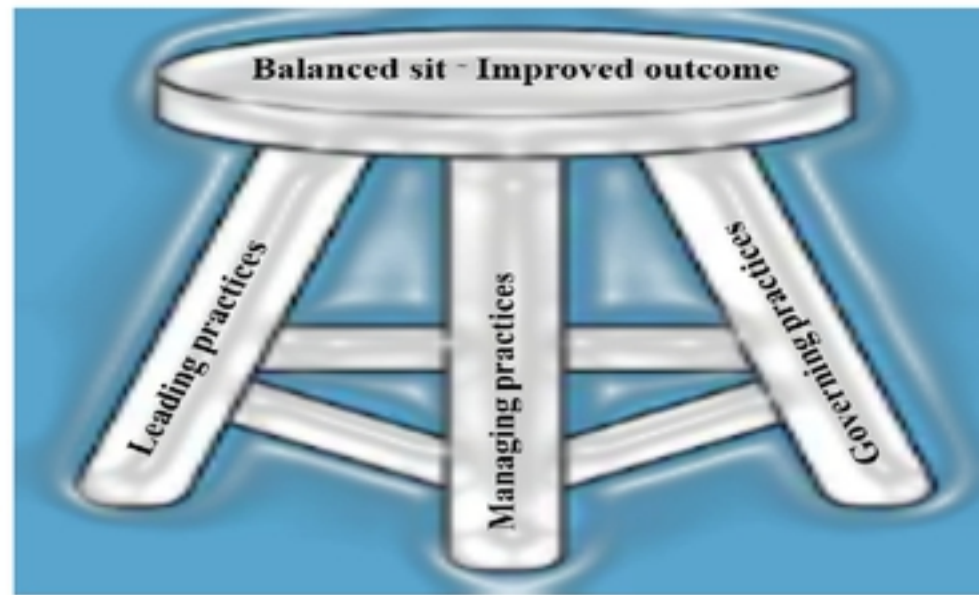

Figure 3

bioRxiv preprint doi: <https://doi.org/10.1101/775858>; this version posted September 19, 2019. The copyright holder for this preprint (which was not certified by peer review) is the author/funder, who has granted bioRxiv a license to display the preprint in perpetuity. It is made available under aCC-BY 4.0 International license.
